# Supplementary material for: Integrated Profiles Analysis Identified a Coding-Non-Coding Signature for Predicting Lymph Node Metastasis and Prognosis in Cervical Cancer
Source: Front Cell Dev Biol. 2021 Jan 21;8:631491. doi: 10.3389/fcell.2020.631491 (PMC7859285; doi:10.3389/fcell.2020.631491)
Supplement: Supplementary Table 1 — Lists of differentially expressed mRNAs and lncRNAs between cervical cancer patients with and without lymph node metastasis. [file Table_1.XLSX]

## Sheet: Sheet1
ENSG id	pvalue	padj
ENSG00000263711	8.08573e-06	0.00219363
ENSG00000261399	0.000556167	0.0444489
ENSG00000259780	2.38459e-05	0.00451736
ENSG00000277837	0.000166036	0.0194077
ENSG00000267665	4.25705e-06	0.00129929
ENSG00000267774	5.38787e-05	0.0085796
ENSG00000276476	6.81713e-05	0.0104032
ENSG00000246022	0.000261835	0.0271407
ENSG00000244036	0.000255727	0.0268881
ENSG00000232721	0.000230324	0.0248107
ENSG00000266049	0.000347284	0.0328947
ENSG00000232139	6.72214e-05	0.01033
ENSG00000259485	4.50434e-06	0.0013376
ENSG00000258168	1.68121e-06	0.00060565
ENSG00000259974	0.000162042	0.0191119
ENSG00000237596	9.66353e-05	0.0136126
ENSG00000226644	1.4404e-08	1.75848e-05
ENSG00000250421	0.000124446	0.0165786
ENSG00000249464	1.15023e-06	0.000515841
ENSG00000255545	2.86095e-06	0.00093164
ENSG00000255794	0.00013389	0.0170072
ENSG00000229719	1.17379e-05	0.00277355
ENSG00000236714	0.000260443	0.0271243
ENSG00000260400	0.000211045	0.0233051
ENSG00000106410	0.000576992	0.0454458
ENSG00000164266	0.000162151	0.0191119
ENSG00000137948	0.000152139	0.0185736
ENSG00000118094	0.000484487	0.0410685
ENSG00000197444	1.10749e-07	7.85065e-05
ENSG00000147378	4.13602e-06	0.00128013
ENSG00000132429	2.68594e-06	0.000908055
ENSG00000180432	0.000394776	0.0357004
ENSG00000189120	0.000487578	0.0410685
ENSG00000176165	0.000270169	0.0276138
ENSG00000198732	1.52775e-07	9.87419e-05
ENSG00000163661	3.89154e-05	0.00678703
ENSG00000158164	7.2948e-06	0.00200379
ENSG00000060709	1.58173e-05	0.00342957
ENSG00000152611	7.84702e-08	5.94615e-05
ENSG00000069764	6.90786e-06	0.00197143
ENSG00000158258	9.85309e-05	0.0137039
ENSG00000257207	0.000407546	0.036065
ENSG00000140459	4.63467e-05	0.00754421
ENSG00000257743	2.26261e-08	2.36766e-05
ENSG00000054938	0.000544064	0.0439552
ENSG00000164007	0.000575331	0.0454458
ENSG00000167800	7.26055e-08	5.73139e-05
ENSG00000183960	0.000178778	0.0205689
ENSG00000188580	0.000251058	0.026524
ENSG00000103546	0.000379724	0.0348346
ENSG00000103316	1.9382e-09	3.54934e-06
ENSG00000135773	9.46359e-06	0.00235341
ENSG00000187144	0.000267141	0.0275606
ENSG00000182985	1.001e-05	0.0024441
ENSG00000102109	0.000272397	0.0277072
ENSG00000165325	0.000424302	0.0368539
ENSG00000113924	4.38076e-05	0.00723814
ENSG00000114248	1.73548e-05	0.00366703
ENSG00000198758	0.000162	0.0191119
ENSG00000165023	4.50046e-06	0.0013376
ENSG00000087250	2.87265e-05	0.00526054
ENSG00000165376	3.18512e-07	0.00019998
ENSG00000133454	5.78393e-05	0.00904594
ENSG00000165917	0.000392673	0.035657
ENSG00000124479	6.62742e-06	0.00191628
ENSG00000101441	2.79084e-06	0.000929222
ENSG00000204936	1.97877e-05	0.00402624
ENSG00000262179	0.000569798	0.0452033
ENSG00000184845	0.000274363	0.0277072
ENSG00000170370	1.18287e-07	8.123e-05
ENSG00000215182	0.00011276	0.0152018
ENSG00000164185	0.000210611	0.0233051
ENSG00000171956	0.000219389	0.0238667
ENSG00000127831	4.02322e-17	8.84102e-13
ENSG00000142609	1.48319e-05	0.00328293
ENSG00000075340	0.000278585	0.0279539
ENSG00000179399	1.47109e-05	0.00328293
ENSG00000123843	4.71646e-09	7.93556e-06
ENSG00000050438	0.000522031	0.0428759
ENSG00000123405	0.000308357	0.0302506
ENSG00000178965	2.32907e-05	0.00448959
ENSG00000110944	1.24977e-06	0.000521098
ENSG00000151023	0.000247787	0.0263049
ENSG00000164619	0.000444884	0.0383629
ENSG00000152953	1.28051e-06	0.000521098
ENSG00000077274	7.57098e-10	2.07965e-06
ENSG00000183091	8.51087e-07	0.000434945
ENSG00000143341	0.000416606	0.0366197
ENSG00000112276	0.00010804	0.0147465
ENSG00000128655	2.17962e-05	0.00427653
ENSG00000179242	9.97071e-07	0.000466184
ENSG00000148734	0.000209595	0.0233051
ENSG00000173698	0.00015969	0.0191119
ENSG00000108342	4.24674e-05	0.00723814
ENSG00000152092	0.000124481	0.0165786
ENSG00000096088	5.22916e-07	0.000294643
ENSG00000101049	0.000370384	0.0343426
ENSG00000187867	9.64917e-07	0.000466184
ENSG00000187122	0.000286016	0.0284398
ENSG00000160182	8.78138e-06	0.00232495
ENSG00000197181	7.15216e-07	0.000374211
ENSG00000123977	1.73887e-06	0.000616318
ENSG00000135519	2.32375e-06	0.000797881
ENSG00000067445	2.94282e-05	0.00530069
ENSG00000171747	1.22172e-07	8.13554e-05
ENSG00000140795	0.000212967	0.0233997
ENSG00000095932	3.15219e-08	3.14861e-05
ENSG00000135447	0.000514999	0.0425455
ENSG00000154027	0.000380446	0.0348346
ENSG00000140107	0.000458512	0.0392055
ENSG00000126950	9.09369e-07	0.000454168
ENSG00000130948	0.000293305	0.0290333
ENSG00000241186	4.28672e-05	0.00723814
ENSG00000143839	0.000404963	0.0360286
ENSG00000178796	0.0001438	0.0180572
ENSG00000075891	0.000162268	0.0191119
ENSG00000259823	9.42355e-06	0.00235341
ENSG00000065534	0.00054889	0.0441827
ENSG00000244731	0.000404856	0.0360286
ENSG00000170579	1.09351e-06	0.000500621
ENSG00000138079	5.05565e-09	7.93556e-06
ENSG00000076716	4.34312e-05	0.00723814
ENSG00000229676	3.25799e-05	0.00577373
ENSG00000154269	5.12636e-07	0.000294643
ENSG00000123838	6.97395e-05	0.0105691
ENSG00000168631	9.4682e-10	2.14252e-06
ENSG00000126970	2.04679e-05	0.00408892
ENSG00000188257	5.10249e-07	0.000294643
ENSG00000157087	0.00025977	0.0271243
ENSG00000260230	0.000206566	0.0231596
ENSG00000138336	8.99965e-06	0.00232667
ENSG00000143473	1.66246e-06	0.00060565
ENSG00000166589	0.000245096	0.0261456
ENSG00000079112	8.03011e-05	0.0116862
ENSG00000106236	4.32016e-08	3.95565e-05
ENSG00000180525	7.29151e-06	0.00200379
ENSG00000270885	0.000103956	0.0142777
ENSG00000139304	0.000526803	0.0428759
ENSG00000232258	0.00024065	0.0257965
ENSG00000121005	0.000357147	0.0335885
ENSG00000164161	1.41564e-06	0.000564099
ENSG00000176293	0.000284431	0.0284108
ENSG00000160963	4.16756e-05	0.0072112
ENSG00000183850	7.09188e-05	0.0106743
ENSG00000078725	1.37947e-05	0.00319094
ENSG00000067842	5.53494e-05	0.00875038
ENSG00000197599	1.42065e-05	0.00321843
ENSG00000205426	5.82689e-11	3.20115e-07
ENSG00000174498	9.4792e-05	0.0134391
ENSG00000135744	7.79018e-05	0.011488
ENSG00000081479	2.91545e-05	0.00529479
ENSG00000153446	0.000503539	0.0419139
ENSG00000156219	3.48173e-08	3.32656e-05
ENSG00000165269	0.000132217	0.016991
ENSG00000173805	0.000420494	0.0368142
ENSG00000002726	9.74982e-10	2.14252e-06
ENSG00000168754	0.000538155	0.0436382
ENSG00000165702	0.000404748	0.0360286
ENSG00000169302	4.35611e-05	0.00723814
ENSG00000196482	0.000199141	0.0225573
ENSG00000184194	0.000102344	0.0141448
ENSG00000204248	0.000140521	0.0177469
ENSG00000145721	0.000133171	0.0170072
ENSG00000080493	2.83337e-05	0.00523221
ENSG00000152292	1.49976e-06	0.000568228
ENSG00000151322	7.84163e-05	0.011488
ENSG00000180745	1.65757e-08	1.91711e-05
ENSG00000144339	1.80711e-09	3.54934e-06
ENSG00000169894	5.19175e-05	0.00832765
ENSG00000181378	1.61843e-05	0.00345292
ENSG00000198788	1.3548e-08	1.75128e-05
ENSG00000154479	0.000169141	0.0196659
ENSG00000180616	0.000445167	0.0383629
ENSG00000186479	0.000229346	0.0248107
ENSG00000112761	2.9679e-13	3.26098e-09
ENSG00000091129	9.50716e-09	1.3928e-05
ENSG00000166866	1.15689e-05	0.00276333
ENSG00000215217	0.000183367	0.0208782
ENSG00000135100	0.000203398	0.0229214
ENSG00000115596	9.4461e-05	0.0134391
ENSG00000140538	0.000146095	0.0182411
ENSG00000164400	0.000108945	0.0147781
ENSG00000243709	1.25622e-10	5.52109e-07
ENSG00000183287	3.41731e-11	2.50318e-07
ENSG00000261857	1.61219e-06	0.000600472
ENSG00000132911	7.80183e-05	0.011488
ENSG00000183117	0.000324426	0.0312687
ENSG00000133101	1.59188e-05	0.00342957
ENSG00000091262	9.53144e-06	0.00235341
ENSG00000134548	1.20321e-06	0.000521098
ENSG00000006611	9.06476e-05	0.0131051
ENSG00000021645	7.12022e-06	0.00200379
ENSG00000203867	7.38966e-05	0.0110468
ENSG00000137860	7.3028e-08	5.73139e-05
ENSG00000158816	4.1194e-06	0.00128013
ENSG00000183691	1.87174e-05	0.00384406
ENSG00000089250	9.32844e-05	0.0133982
ENSG00000102243	0.000129923	0.0168938
ENSG00000196188	0.000214871	0.0234915
ENSG00000178401	3.01687e-05	0.0053899
ENSG00000158113	0.000388776	0.0354496
ENSG00000034239	9.86777e-07	0.000466184
ENSG00000249715	2.44846e-05	0.00459871
ENSG00000188517	0.000487776	0.0410685
ENSG00000168702	0.000181349	0.020756
ENSG00000224389	0.000372247	0.0343703
ENSG00000087085	0.000268854	0.0276078
ENSG00000169933	0.000502435	0.0419139
ENSG00000108551	0.000508454	0.0421633
ENSG00000102678	9.08507e-08	6.65482e-05
ENSG00000077327	5.74715e-08	5.05174e-05
ENSG00000180537	4.30906e-05	0.00723814
ENSG00000170439	1.82686e-05	0.00378728
ENSG00000100604	3.33519e-10	1.22151e-06
ENSG00000183780	8.20706e-06	0.00219939
ENSG00000132744	8.98816e-06	0.00232667
ENSG00000259207	1.40773e-05	0.00321843
ENSG00000109956	2.50706e-05	0.00466886
ENSG00000153012	9.12393e-06	0.00233138
ENSG00000146166	0.000311426	0.030416
ENSG00000249307	4.11375e-06	0.00128013
ENSG00000233098	0.000320465	0.031023
ENSG00000271321	0.000129477	0.0168938
ENSG00000096968	5.82562e-07	0.000320045
ENSG00000197921	0.000274866	0.0277072
ENSG00000179292	1.22189e-06	0.000521098
ENSG00000198483	0.000127083	0.0167224
ENSG00000105409	2.09706e-05	0.00415162
ENSG00000179542	2.01494e-05	0.00406224
ENSG00000147041	1.25706e-06	0.000521098
ENSG00000161905	1.49394e-05	0.00328293
ENSG00000107020	1.10591e-08	1.5189e-05
ENSG00000089847	6.0197e-07	0.000322641
ENSG00000172482	0.000603908	0.0472273
ENSG00000143590	5.80422e-05	0.00904594
ENSG00000135218	0.000314754	0.030605
ENSG00000158874	0.000360723	0.0335885
ENSG00000118137	9.81763e-05	0.0137039
ENSG00000105143	1.43752e-06	0.000564099
ENSG00000159556	4.82977e-07	0.000294643
ENSG00000117601	0.000626961	0.0488563
ENSG00000177103	6.01632e-06	0.00176278
ENSG00000169083	0.000471837	0.0401885
ENSG00000187527	1.11602e-05	0.00269501
ENSG00000167769	0.000150749	0.0185736
ENSG00000113905	6.31571e-10	1.98268e-06
ENSG00000153714	0.00013193	0.016991
ENSG00000135374	0.000161874	0.0191119
ENSG00000103184	2.23682e-05	0.00434992
ENSG00000186868	2.16361e-08	2.36766e-05
